# Supplementary material for: Enhancing local search algorithms for job shops with min-sum objectives by approximate move evaluation
Source: Springer Nature journal article supplement (doi:10.1007/s10951-012-0305-x), 2013-01-08
Supplement: 10951_2012_305_MOESM1_ESM.pdf [file 10951_2012_305_MOESM1_ESM.pdf]

# Enhancing Local Search Algorithms for Job Shops with Min-sum Objectives by Approximate Move Evaluation

Roland Braune, Günther Zäpfel  
Institute of Production and Logistics Management  
Johannes Kepler University, Altenbergerstrasse 69  
4040 Linz, Austria  
{roland.braune, guenther.zaepfel}@jku.at

Michael Affenzeller  
Department of Software Engineering  
Upper Austria University of Applied Sciences  
4232 Hagenberg, Austria  
michael.affenzeller@fh-hagenberg.at

Supplementary Material, Submitted to Journal of Scheduling

## A Detailed t-test results

This section provides detailed results of a Student's t-test, performed in order to answer the question whether the new estimation scheme is significantly better than the existing one according to Balas and Vazacopoulos. The t-test is based on a series of objective function values obtained during multiple runs of the ILS and TS method respectively. In fact it checks whether the average solution quality obtained by the new scheme is significantly lower than the one achieved by Balas' approach (one-sided t-test).

Table A.1:  $p$ -values originating from a one-sided Student's t-test (TWCT objective)

| Inst. | $n$ | $m$ | FI ILS |        | BI ILS |        | FI TS                 |                       | BI TS |        |
|-------|-----|-----|--------|--------|--------|--------|-----------------------|-----------------------|-------|--------|
|       |     |     | ATC    | Random | ATC    | Random | ATC                   | Random                | ATC   | Random |
| LJB1  | 30  | 3   | 0.08   | 0.042  | 0.996  | 0.999  | $1.12 \cdot 10^{-37}$ | $9.95 \cdot 10^{-48}$ | —     | —      |
| LJB2  | 30  | 3   | 0.395  | 0.462  | 0.977  | 0.999  | 0.274                 | 0.567                 | —     | 0.381  |
| LJB7  | 50  | 5-8 | 0.318  | 0.164  | 0.496  | 0.946  | $1.22 \cdot 10^{-5}$  | $2.45 \cdot 10^{-10}$ | —     | —      |
| LJB9  | 50  | 5-8 | 0.5    | 0.491  | 0.582  | 0.628  | 0.003                 | 0.989                 | —     | —      |
| LJB10 | 50  | 5-8 | 0.355  | 0.077  | 0.962  | 0.698  | 0.021                 | $7.21 \cdot 10^{-62}$ | —     | —      |
| LJB12 | 50  | 5-8 | 0.5    | 0.258  | 0.003  | 0.135  | —                     | $3.15 \cdot 10^{-53}$ | —     | —      |

Table A.2:  $p$ -values originating from a one-sided Student's t-test (TWT objective)

| Inst. | $n$ | $m$ | FI ILS |        | BI ILS                |                      | FI TS                 |                       | BI TS                 |                       |
|-------|-----|-----|--------|--------|-----------------------|----------------------|-----------------------|-----------------------|-----------------------|-----------------------|
|       |     |     | ATC    | Random | ATC                   | Random               | ATC                   | Random                | ATC                   | Random                |
| la26  | 20  | 10  | 0.837  | —      | 0.706                 | —                    | $1.97 \cdot 10^{-9}$  | —                     | $2.48 \cdot 10^{-31}$ | —                     |
| la27  | 20  | 10  | 0.071  | —      | 0.945                 | —                    | $2.62 \cdot 10^{-15}$ | —                     | $2.57 \cdot 10^{-25}$ | —                     |
| la28  | 20  | 10  | 0.566  | —      | 0.852                 | —                    | $1.75 \cdot 10^{-11}$ | —                     | —                     | —                     |
| la29  | 20  | 10  | 0.373  | —      | 0.003                 | —                    | $4.7 \cdot 10^{-13}$  | —                     | —                     | —                     |
| la30  | 20  | 10  | 0.466  | —      | 0.002                 | —                    | $5.7 \cdot 10^{-11}$  | —                     | $2.12 \cdot 10^{-30}$ | —                     |
| la31  | 30  | 10  | 0.215  | —      | 0.483                 | —                    | $1.15 \cdot 10^{-18}$ | —                     | $3.22 \cdot 10^{-53}$ | —                     |
| la32  | 30  | 10  | 0.876  | —      | 0.009                 | —                    | $1.27 \cdot 10^{-46}$ | —                     | $1.69 \cdot 10^{-53}$ | —                     |
| la33  | 30  | 10  | 0.053  | —      | 0.003                 | —                    | $1.84 \cdot 10^{-29}$ | —                     | $3.17 \cdot 10^{-34}$ | —                     |
| la34  | 30  | 10  | 0.934  | —      | 0.05                  | —                    | $1.76 \cdot 10^{-35}$ | —                     | $1.15 \cdot 10^{-47}$ | —                     |
| la35  | 30  | 10  | 0.309  | —      | 0.975                 | —                    | $5.52 \cdot 10^{-36}$ | —                     | $3.08 \cdot 10^{-34}$ | —                     |
| LJB1  | 30  | 3   | 0.156  | 0.254  | $1.56 \cdot 10^{-5}$  | $1.95 \cdot 10^{-5}$ | $1.11 \cdot 10^{-46}$ | $2.04 \cdot 10^{-28}$ | —                     | —                     |
| LJB2  | 30  | 3   | 0.5    | 0.442  | 0.998                 | 0.97                 | 0.716                 | 0.05                  | —                     | —                     |
| LJB7  | 50  | 5-8 | 0.196  | 0.087  | 0.33                  | 0.196                | $2.28 \cdot 10^{-16}$ | $5.19 \cdot 10^{-14}$ | —                     | —                     |
| LJB9  | 50  | 5-8 | 0.5    | 0.474  | 0.637                 | 0.056                | $4.99 \cdot 10^{-12}$ | 0.571                 | —                     | $3.579 \cdot 10^{-4}$ |
| LJB10 | 50  | 5-8 | 0.5    | 0.282  | 0.288                 | 0.447                | 0.001                 | $1.46 \cdot 10^{-56}$ | —                     | —                     |
| LJB12 | 50  | 5-8 | 0.5    | 0.153  | $6.174 \cdot 10^{-4}$ | 0.593                | 0.041                 | $4.58 \cdot 10^{-37}$ | —                     | —                     |
| swv11 | 50  | 10  | 0.914  | —      | 0.014                 | —                    | $1.36 \cdot 10^{-9}$  | —                     | $1.93 \cdot 10^{-31}$ | —                     |
| swv12 | 50  | 10  | 0.956  | —      | 0.169                 | —                    | $1.57 \cdot 10^{-16}$ | —                     | $8.91 \cdot 10^{-23}$ | —                     |
| swv13 | 50  | 10  | 0.989  | —      | 0.686                 | —                    | $1.57 \cdot 10^{-18}$ | —                     | $1.11 \cdot 10^{-33}$ | —                     |
| swv14 | 50  | 10  | 0.949  | —      | 0.204                 | —                    | $1.97 \cdot 10^{-8}$  | —                     | $2.05 \cdot 10^{-18}$ | —                     |
| swv15 | 50  | 10  | 0.962  | —      | 0.424                 | —                    | $7.66 \cdot 10^{-7}$  | —                     | $1.07 \cdot 10^{-7}$  | —                     |

Table A.3:  $p$ -values originating from a one-sided Student's  $t$ -test (TWT objective, contd.)

| Inst. | $n$ | $m$ | FI ILS |        | BI ILS |        | FI TS                 |        | BI TS                 |        |
|-------|-----|-----|--------|--------|--------|--------|-----------------------|--------|-----------------------|--------|
|       |     |     | ATC    | Random | ATC    | Random | ATC                   | Random | ATC                   | Random |
| ta51  | 50  | 15  | 0.113  | –      | 0.957  | –      | $3.24 \cdot 10^{-49}$ | –      | –                     | –      |
| ta52  | 50  | 15  | 0.155  | –      | 0.811  | –      | $3.54 \cdot 10^{-19}$ | –      | –                     | –      |
| ta53  | 50  | 15  | 0.166  | –      | 0.909  | –      | $1.2 \cdot 10^{-54}$  | –      | $4.38 \cdot 10^{-50}$ | –      |
| ta54  | 50  | 15  | 0.54   | –      | 0.999  | –      | $1.17 \cdot 10^{-23}$ | –      | $8.28 \cdot 10^{-64}$ | –      |
| ta55  | 50  | 15  | 0.442  | –      | 0.973  | –      | $5.81 \cdot 10^{-28}$ | –      | $3.98 \cdot 10^{-54}$ | –      |
| ta71  | 100 | 20  | 0.209  | –      | 0.999  | –      | $1.08 \cdot 10^{-51}$ | –      | –                     | –      |
| ta72  | 100 | 20  | 0.044  | –      | –      | –      | $1.18 \cdot 10^{-45}$ | –      | $6.21 \cdot 10^{-50}$ | –      |
| ta73  | 100 | 20  | 0.537  | –      | 0.999  | –      | $9.91 \cdot 10^{-51}$ | –      | $1.98 \cdot 10^{-51}$ | –      |
| ta74  | 100 | 20  | 0.122  | –      | –      | –      | $2.71 \cdot 10^{-50}$ | –      | –                     | –      |
| ta75  | 100 | 20  | 0.007  | –      | 0.999  | –      | $3.56 \cdot 10^{-44}$ | –      | –                     | –      |

Table A.4:  $p$ -values originating from a one-sided Student's t-test ( $\sum_i w_i U_i$  objective)

|    | Inst. | $n$ | $m$ | FI ILS |        | BI ILS |        | FI TS                 |                       | BI TS                 |                       |
|----|-------|-----|-----|--------|--------|--------|--------|-----------------------|-----------------------|-----------------------|-----------------------|
|    |       |     |     | ATC    | Random | ATC    | Random | ATC                   | Random                | ATC                   | Random                |
| CT | LJB1  | 30  | 3   | 0.197  | 0.136  | 0.57   | 0.092  | $4.14 \cdot 10^{-17}$ | $1.62 \cdot 10^{-17}$ | $8.37 \cdot 10^{-9}$  | $6.33 \cdot 10^{-8}$  |
|    | LJB2  | 30  | 3   | 0.426  | 0.46   | 0.35   | 0.616  | 0.998                 | 0.564                 | 0.131                 | 0.118                 |
|    | LJB7  | 50  | 5-8 | 0.133  | 0.052  | 0.012  | 0.018  | $5.94 \cdot 10^{-12}$ | $1.68 \cdot 10^{-18}$ | $5.74 \cdot 10^{-35}$ | $1.97 \cdot 10^{-50}$ |
|    | LJB9  | 50  | 5-8 | 0.394  | 0.478  | 0.493  | 0.802  | 0.732                 | 0.976                 | 0.001                 | 0.056                 |
|    | LJB10 | 50  | 5-8 | 0.45   | 0.495  | 0.287  | 0.183  | 0.33                  | 0.006                 | 0.013                 | $1.79 \cdot 10^{-7}$  |
|    | LJB12 | 50  | 5-8 | 0.1    | 0.346  | 0.454  | 0.564  | $3.24 \cdot 10^{-14}$ | $3.85 \cdot 10^{-14}$ | $2.52 \cdot 10^{-38}$ | $3.43 \cdot 10^{-43}$ |
